# Supplementary material
Source: PubMed Central journal article supplement (PMC2713131)
Supplement: mol.109.054650_1.pdf [file mol.109.054650_1.pdf]

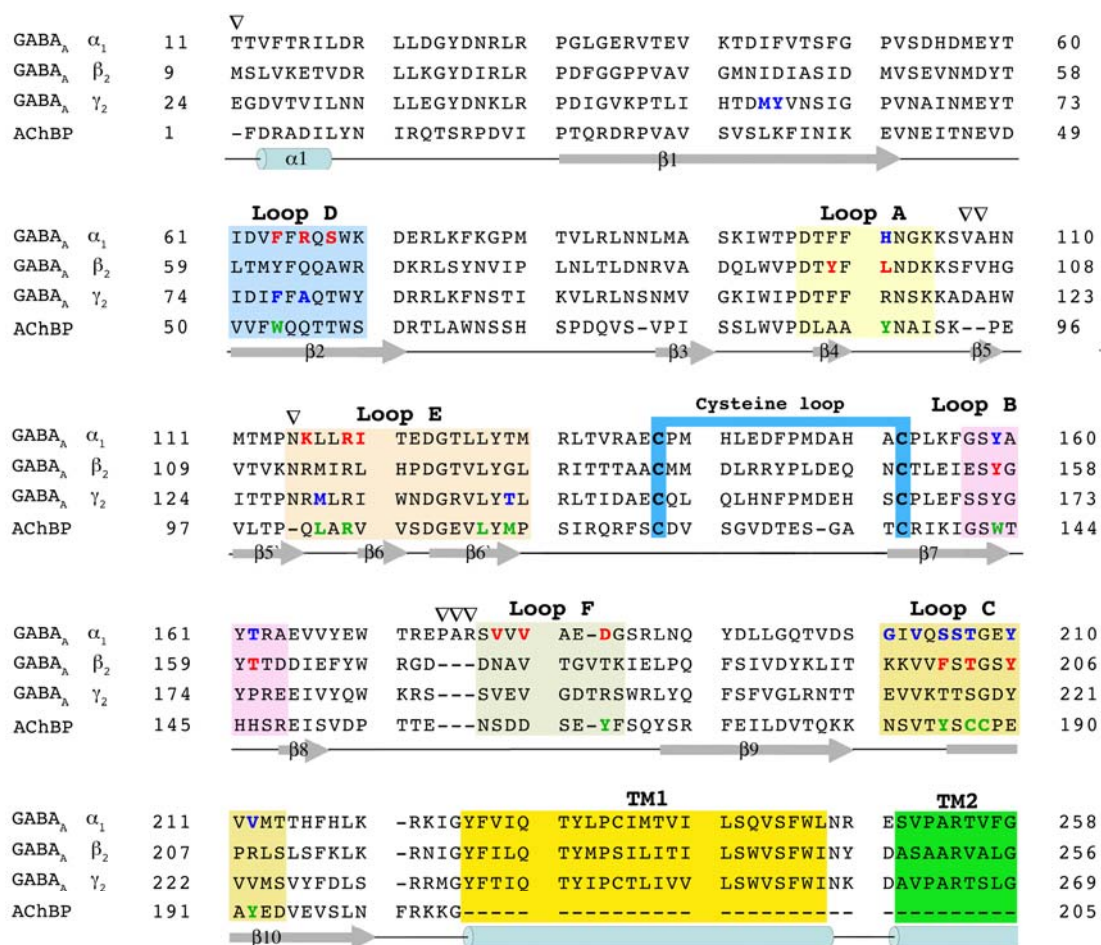

Supplemental Figure 1

Supplemental Figure 1. Alignment of the ligand-binding domain of the GABA<sub>A</sub>R α<sub>1</sub>, β<sub>2</sub> and γ<sub>2</sub> subunits and AChBP. Residues forming the cysteine loop are highlighted in blue. The secondary structure is represented by barrels (helices) and arrows (β-sheets) pictured underneath the alignment. Colored highlighting indicates six regions thought to play a role in ligand binding: loops A, B, C, D, E and F. Residues that are thought to contribute to the agonist recognition site are in red and those thought to contribute to the BZD binding site are in blue. Residues within a radius of 5 Å of nicotine molecules in the AChBP structure are indicated in green (Brjec et al., 2001). The ∇ symbol indicates structurally ambiguous areas of alignment of the GABA<sub>A</sub>R subunits and AChBP. Precursor peptide sequences of rat subunits were obtained from NCBI (acc. codes: P18504 for alpha1; P15432 for beta2; P22723 for gamma2). Ligand binding domains were aligned using the Align123 algorithm from Discovery Studio software package.

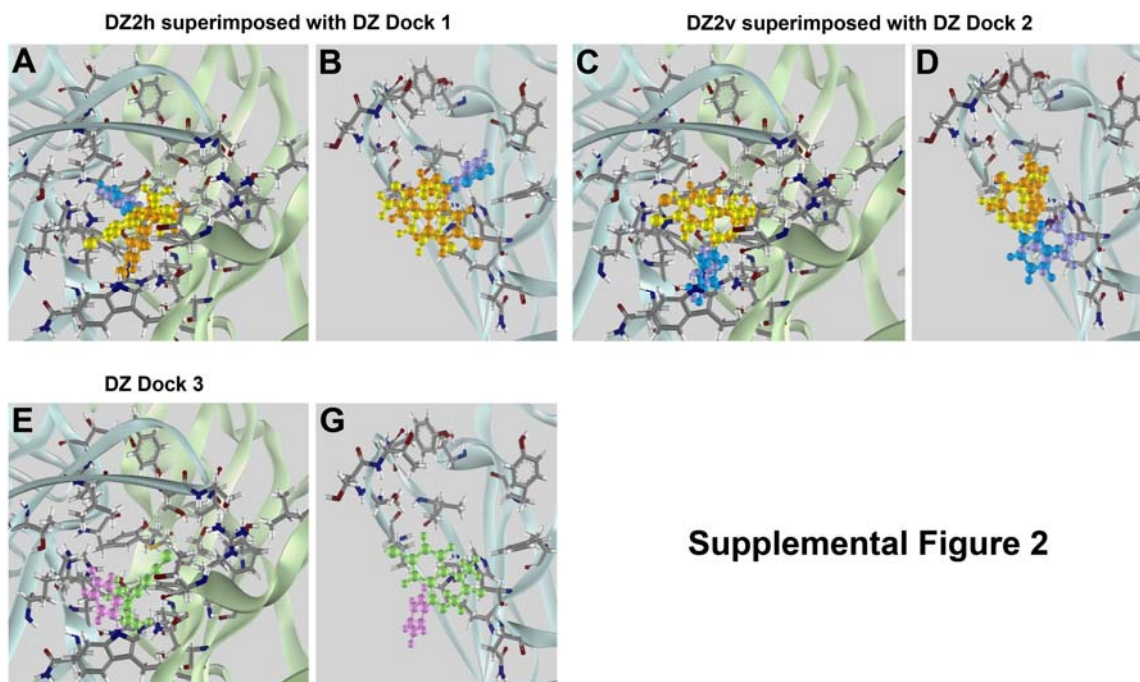

Supplemental Figure 2. Superposition of orientations of DZ obtained by manual and automated docking (**A-G**). For DZ there is a good overlap between DZ2h (orange-blue) and DZ dock 1 (yellow-violet) (**A, B**; RMSD = 1.8Å) and between DZ2v (orange-blue) and DZ dock 2 (yellow-violet) (**C, D**; RMSD = 1.36Å). The DZ dock 3 (green-pink) is also depicted. Pairs of images depict the BZD binding pocket viewed from outside of the receptor (**A, C, E**) and from within the binding pocket looking toward the  $\alpha$  subunit (**B, D, G**).

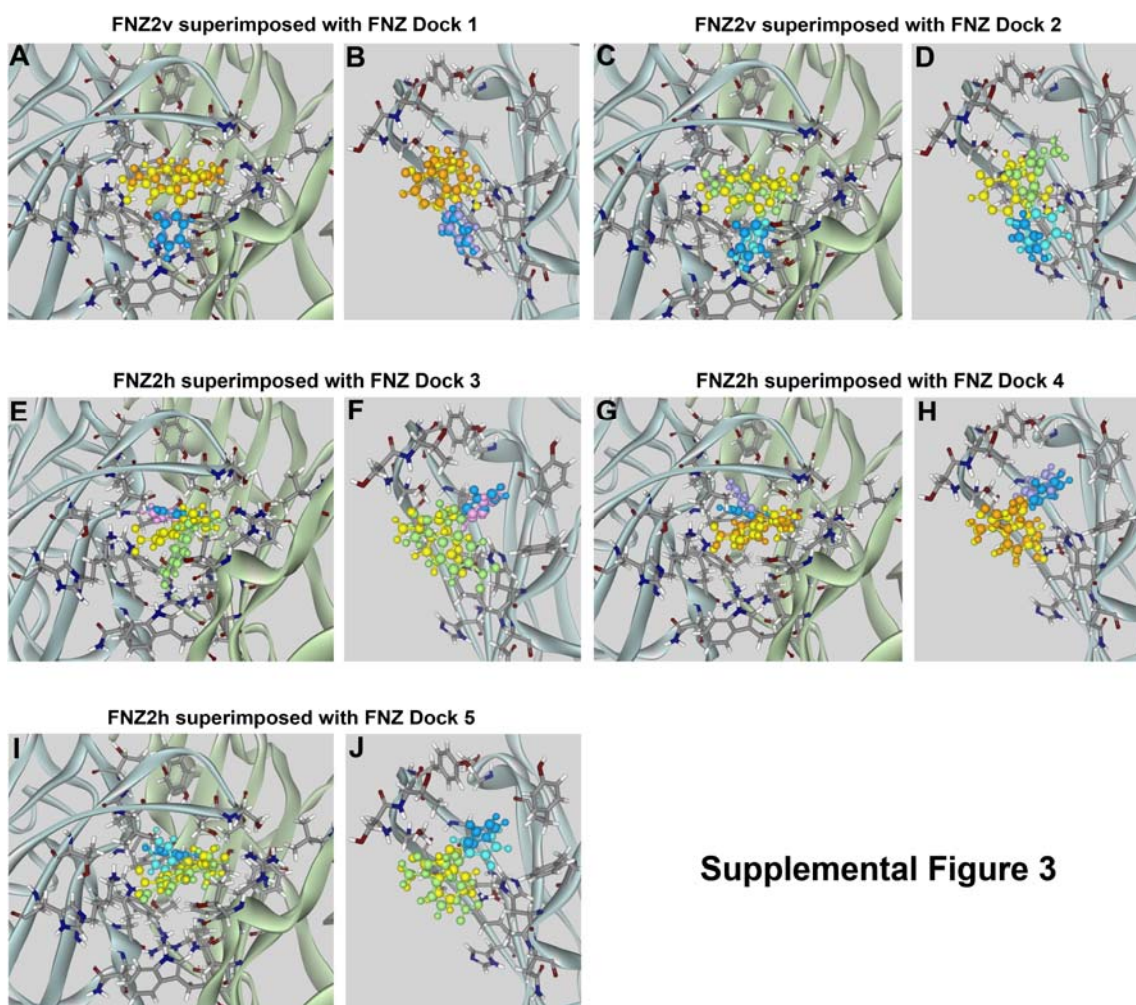

Supplemental Figure 3. Superposition of FNZ orientations obtained via manual and automated docking (**A-J**). Automated docking orientations FNZ dock 1 (**A** and **B**, orange-violet) and FNZ dock 2 (**C** and **D**, green-cyan) resemble manual docking orientation FNZ2v (yellow-blue) with respective RMSD of 0.81Å and 3.04Å. Similarly, automated docking orientations FNZ dock 3 (**E** and **F**, green, pink), FNZ dock 4 (**E** and **F**, orange-violet) and FNZ dock 5 (**I** and **J**, green-cyan) resemble manual orientation FNZ2h (**G** and **H**, yellow-blue) with respective RMSD of 3.82 Å, 1.06Å and 1.46Å. Pairs of images depict the BZD binding pocket viewed from outside of the receptor (**A**, **C**, **E**, **G**, **I**) and from within the binding pocket looking toward the  $\alpha$  subunit (**B**, **D**, **F**, **G**, **J**).

|                                                                                | Ligands                | Energy,<br>(kcal/mol) | Population, % |
|--------------------------------------------------------------------------------|------------------------|-----------------------|---------------|
| <b>M<br/>A<br/>N<br/>U<br/>A<br/>L<br/><br/>D<br/>O<br/>C<br/>K</b>            | DZ1h                   | -110                  | 100%          |
|                                                                                | DZ1v                   | -96                   | 100%          |
|                                                                                | DZ2h <sup>#</sup>      | -78                   | 100%          |
|                                                                                | DZ2v <sup>##</sup>     | -77                   | 100%          |
|                                                                                | FNZ1h                  | -329                  | 100%          |
|                                                                                | FNZ1v                  | -314                  | 100%          |
|                                                                                | FNZ2h*                 | -275                  | 100%          |
|                                                                                | FNZ2v**                | -286                  | 100%          |
| <b>C<br/>D<br/>O<br/>C<br/>K<br/><br/>E<br/>R<br/><br/>D<br/>O<br/>C<br/>K</b> | DZ dock1 <sup>#</sup>  | -58                   | 35%           |
|                                                                                | DZ dock2 <sup>##</sup> | -68                   | 35%           |
|                                                                                | DZ dock3               | -38                   | 30%           |
|                                                                                | FNZ dock1**            | -249                  | 30%           |
|                                                                                | FNZ dock2              | -228                  | 20%           |
|                                                                                | FNZ dock3              | -160                  | 25%           |
|                                                                                | FNZ dock4*             | -255                  | 5%            |
|                                                                                | FNZ dock5*             | -266                  | 20%           |

Supplemental Table 1. DZ and Flu docking energies (kcal/mol). Manual docking of DZ (DZ1h, DZ1v, DZ2h, DZ2v) and FNZ (FNZ1h, FNZ1v, FNZ2h, FNZ2v) docking simulations was carried out as detailed under *Materials and Methods*. Automated docking using CDOCKER yielded three orientations of DZ (DZ dock1-3) and five orientations of FNZ (FNZ dock1-5). Potential energies were calculated using Calculate Interaction Energy protocol. Symbols (#, ##, \*, \*\*) identify similar models.

| Residue (atom number) | Distance, Å | Chain (Flu-2h)/Atom ID |
|-----------------------|-------------|------------------------|
| $\alpha$ 1F99 (HE1)   | 3.8         | F-H (7441)             |
| $\alpha$ 1H101 (HD1)  | 2.1         | F-N (7433)             |
| $\alpha$ 1N102 (HA)   | 6.9         | F-O (7448)             |
| $\alpha$ 1K155 (HZ3)  | 1.7         | F-O (7447)             |
| $\alpha$ 1Y159 (HA)   | 2.3         | F-H (7441)             |
| $\alpha$ 1T162 (HA)   | 7.7         | F-H (7441)             |
| $\alpha$ 1G200 (O)    | 7.2         | F-O (7447)             |
| $\alpha$ 1V202 (HG11) | 3.1         | F-O (7447)             |
| $\alpha$ 1S204 (HG)   | 1.8         | F-O (7431)             |
| $\alpha$ 1S205 (HN)   | 2.8         | F-O (7431)             |
| $\alpha$ 1T206 (HG23) | 3.3         | F-N (7423)             |
| $\alpha$ 1Y209 (HH)   | 5.0         | F-H (7442)             |
| $\alpha$ 1V211 (HG11) | 2.6         | F-H (7440)             |
| $\alpha$ 1T213 (H21)  | 3.8         | F-O (7431)             |
| $\gamma$ 2Y58 (HD1)   | 3.0         | F-H (7438)             |
| $\gamma$ 2N60 (OD1)   | 5.3         | F-H (7437)             |
| $\gamma$ 2D75 (OD1)   | 9.3         | F-H (7437)             |
| $\gamma$ 2F77 (HE2)   | 4.1         | F-H (7437)             |
| $\gamma$ 2A79 (HB2)   | 6.9         | F-F (7443)             |
| $\gamma$ 2T126 (HG1)  | 5.9         | F-H (7441)             |
| $\gamma$ 2M130 (HE1)  | 5.4         | F-H (7442)             |
| $\gamma$ 2T142 (HG21) | 4.5         | F-F (7443)             |
| $\gamma$ 2R144 (HH12) | 6.9         | F-O (7448)             |
| $\gamma$ 2V188 (HG11) | 5.7         | F-O (7431)             |
| $\gamma$ 2T193 (HG22) | 2.3         | F-H (7444)             |
| $\gamma$ 2R194 (HH11) | 1.6         | F-O (7431)             |
| $\gamma$ 2W196 (HE1)  | 5.6         | F-H (7434)             |

Supplemental Table 2. Interatomic distances between closest pair of atoms belonging to the binding site residue and that of Flu were measured by 'Monitor Distance' tool of Discovery Studio using the pdb file with 2h orientations.
